# Supplementary material for: XNP/dATRX interacts with DREF in the chromatin to regulate gene expression
Source: PubMed Central journal article supplement — Nucleic Acids Res. 2011 Oct 22;40(4):1460–74. doi: 10.1093/nar/gkr865 (PMC3287189; doi:10.1093/nar/gkr865), 2011-10-22
Supplement: supp_gkr865_nar-02131-m-2011-File009.pdf [file supp_gkr865_nar-02131-m-2011-File009.pdf]

**Supplementary information.**

Supp. Table 1. Clones identified by a yeast-hybrid screening with XNP/dATRX.

| CLONE           | HIT IN FLYBASE                          | CLONE    | HIT flybase            |
|-----------------|-----------------------------------------|----------|------------------------|
| A 1-3<br>40 ab1 | CG4440 putative<br>DEAD-box<br>helicase | 17 cb2   | CG12750<br>nucampholin |
| 40 ab2          | CG10597<br>RNA helicase                 | 26 cb1   | CG2238<br>EF2b         |
| 47 cb-1         | CG33526<br>PNUTS                        | 51 cb1   | CG11051<br>NPLP2       |
| 10ab1           | CG3048<br>TRAF1                         | 51 cb2   | CG15213                |
| 63 cb1          | CG5163<br>TFIIA-S                       | C 45     | CG42281<br>BUNCHED     |
| A14             | CG 3333<br>NOP60B                       |          |                        |
| 1 ab2<br>1 ab4  | CG5838<br>DREF                          | 25 cb2   | CG17521<br>Qm          |
| 21 ab2          | CG6341<br>elongation<br>factor beta 1   | 55 cb2   | CG5920<br>SOP          |
|                 |                                         | 47 cb3   | CG9922                 |
|                 |                                         | 51 cb2   | CG9034                 |
|                 |                                         | 58 cb2   | CG9995<br>HTT          |
|                 |                                         | C64 cb97 | CG16738<br>Slp1        |

**Supp. Table 1. XNP/dATRX-interacting clones identified by the yeast two-hybrid screening.** Clone number indicates interaction with dATRX N-terminus (ab) or C-terminus (cb). Note that several clones encode transcription factors or proteins that participate in chromatin dynamics.

Valadez\_Supp. Fig. 1 S1

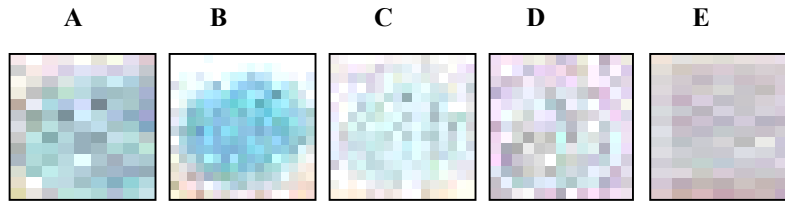

**Supp. Fig. 1. Growth in selective QDO media and  $\beta$ -galactosidase activity of yeast expressing the N-terminal domain of XNP/dATR<sub>X</sub> and DREF.** A) Positive control of the interaction between SV40 antigen with p53. B) Interaction between the N-terminal region of XNP/dATR<sub>X</sub> with the CR3 domain of DREF. C) Interaction between the C-terminal region of XNP/dATR<sub>X</sub> and CG9922. D) Negative control, SV40 antigen-lam. E) Negative control, pGBKT7-DREF.

Valadez\_Supp. Fig 2 S2.

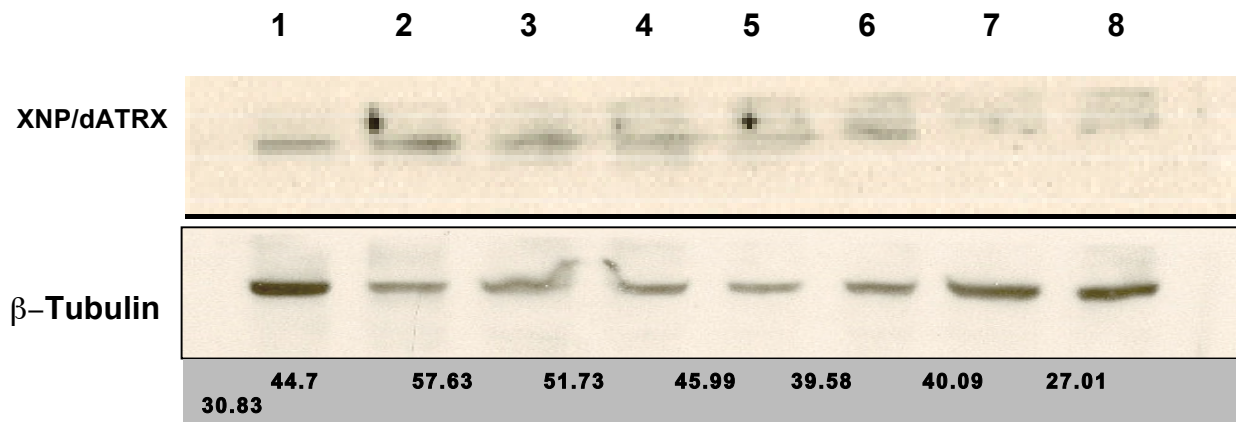

**Supp. Fig 2. XNP/dATR<sub>X</sub> levels in protein extracts from adult flies thoraxes with different XNP/dATR<sub>X</sub> and *pnr* genotypes.** In the upper panel the Western blot was performed against XNP/dATR<sub>X</sub> and in the lower panel an anti  $\beta$ -tubulin antibody was used as a loading control. The genotypes in each protein preparation are: lane 1 *OreR*; Lane 2, *UAS-dATR<sub>X</sub>i/UAS-dATR<sub>X</sub>i*; Lane 3, *pnr-Gal4/+*; Lane 4, *UAS-dATR<sub>X</sub>i/+ ; pnr-Gal4/+*; Lane 5, *UAS-dATR<sub>X</sub>i/UAS-dATR<sub>X</sub>i ; pnr-Gal4/+*; Lane 6 *UAS-dATR<sub>X</sub>i/+ ; pnr-Gal4/pnr-Gal4*; Lane 7 and 8 *UAS-dATR<sub>X</sub>i/UAS-dATR<sub>X</sub>i; pnr-Gal4/pnr-Gal4*. XNP/dATR<sub>X</sub> levels are lower in flies with two copies of the inducible RNAi than in flies with one copy. Numbers at the bottom are the relative value between XNP/dATR<sub>X</sub> and  $\beta$ -tubulin after densitometric analysis of the bands.

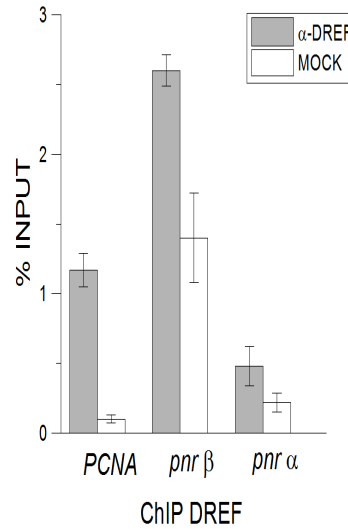

**Supp. Fig 3. ChIP assay using a specific antibody against DREF to determine if the DREF factor is poised in the *DRE-pnrα* and *DRE-pnrβ* elements in chromatin derived from wild type embryos.** As a positive control we used a PCNA sequence that is recognized by DREF. Graphs show the results from three independent immunoprecipitation reactions (n=3). ChIP signals quantified by means of quantitative polymerase chain reaction, are presented as % of the input. As it can be observed in the figure, the PCNA and *pnrβ* chromatin regions are significantly enriched when the precipitation was carried out with the DREF antibody. The *DRE-pnrα* region does not show a significant difference with the control.

Valadez. Supp. Fig.4 S4

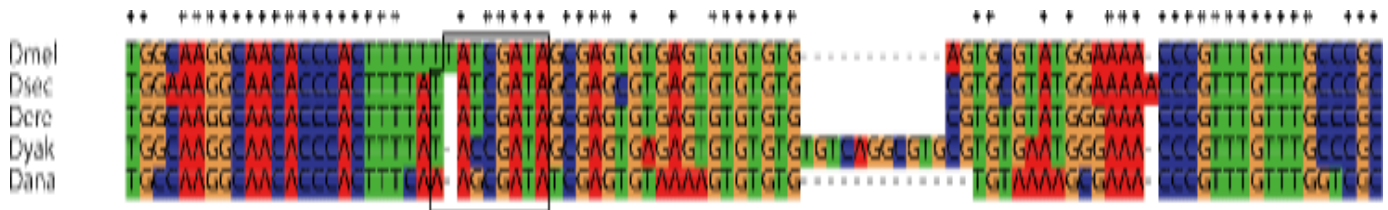

**Supp. Fig 4. A genomic region upstream of *pnr-β* is highly conserved among the *melanogaster* group.** The genomic regions located upstream of the *pannier* transcription unit in *Drosophila melanogaster* were compared among available sequences of *Drosophila* species using Flybase Blast (<http://flybase.net/blast/>). After identifying a conserved region in some of these *Drosophila* species, the corresponding sequences were aligned using the Clustal X program. In this region the putative DNA replication element (DRE, indicated by the box) is identical in *D.melanogaster*, *D. sechellia* and *D.erecta*. Compared to *D. melanogaster* sequences *D. yakuba* has one mismatch, *D. ananassae* has two base pair differences, nevertheless all of them conserve the GATA motif at the end of the octamer. Note that nucleotide sequence around the DRE element is highly conserved among the *melanogaster* group, suggesting that this region has a relevant role in the regulation of *pnr*.

Valadez\_Supp. Fig. 5 S5

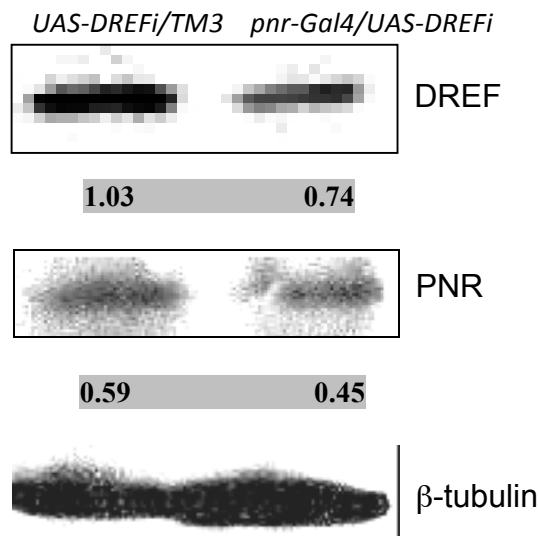

**Supp. Fig. 5. Reduction of DREF and PNR protein levels in the thorax of DREF knockdown flies.** Specific antibodies were used to detect DREF (upper panel) and PNR (middle panel). An anti β-tubulin antibody was used as a loading control (bottom panel). Genotypes of the flies are indicated. Numbers represent the value of the relation between DREF and Pnr with β-tubulin after densitometric analysis of the bands.

Valadez\_Supp. Fig. 6 S6.

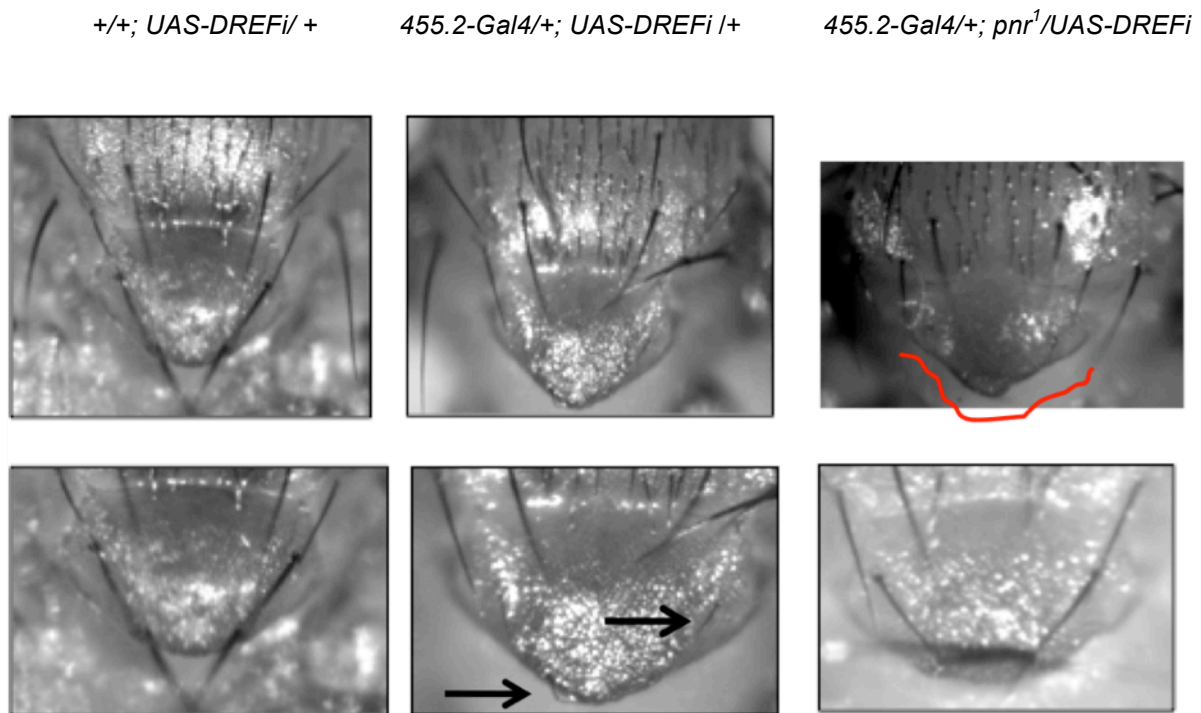

**Supp. Fig. 6. Depletion of DREF in the scutellum reduces or eliminates the macrochaetes and in combination with *pannier* alleles the scutellum is deformed.** The genotypes are indicated in the figure. Arrows show the reduction or absence of bristles. Scutellum size is smaller with irregular borders (shown by the red line) in *455.2-Gal4/+; pnr<sup>1</sup>/UAS-DREFi* flies.

Valadez- Supp. Fig 7

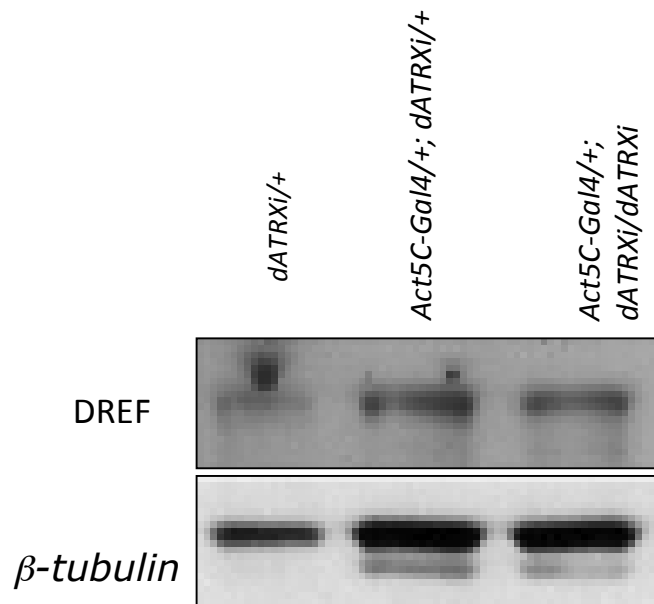

**Supp. Fig. 7. Depletion of XNP/dATRX by RNAi in adult organisms does not affect DREF levels.** DREF levels were detected in adult flies protein extracts expressing an RNAi against XNP/dATRX using the *Act5C-Gal4* driver or without it. Tubulin was used as a loading control. Genotypes are indicated in the figure.
